# Supplementary material for: Cultural adaptation and validation of the Sinhalese version of the Female Sexual Function Index (FSFI-SL) among patients admitted to gynecological wards at a tertiary care center in Sri Lanka
Source: Research Square preprint supplement (doi:10.21203/rs.3.rs-7251712/v1), 2025-12-01
Supplement: Supplementary file 1 [file c42263eb65ab38077ee077d0.xlsx]

## Sheet: page-1_table-1
	Desire: frequency	Desire:Ievel	Arousal: frequency	Arousal: level	Arousal: confidence	Arousal: satisfaction	Lubrication: frequency	Lubrication: difficulty	Lubrication: frequency of maintaining	Lubrication: difficulty in maintaining	Orgasm: frequency	Orgasm: difficulty	Orgasm: satisfaction	Satisfaction: intimacy of partner	Satisfaction: sexual relationship	Satisfaction: with overall sex life	Pain: frequency during vaginal intercourse	Pain: frequency after vaginal penetration	Pain: level during or after vaginal penetration
Desire: frequency	1.000	0.367	0.517	0.472	0.406	0.456	0.464	0.226	0.420	0.161	0.391	0.343	0.198	0.316	0.072	0.254	0.070	0.197	0.222
Desire: level	0.367	1.000	0.513	0.714	0.720	0.555	0.580	0.497	0.521	0.457	0.617	0.475	0.563	0.574	0.397	0.509	0.392	0.442	0.335
Arousal: frequency	0.517	0.513	1.000	0.672	0.687	0.603	0.775	0.613	0.618	0.491	0.603	0.465	0.534	0.599	0.271	0.436	0.280	0.501	0.425
Arousal: level	0.472	0.714	0.672	1.000	0.866	0.771	0.754	0.755	0.685	0.736	0.687	0.706	0.723	0.721	0.431	0.581	0.586	0.603	0.585
Arousal: confidence	0.406	0.720	0.687	0.866	1.000	0.776	0.755	0.806	0.720	0.770	0.696	0.717	0.735	0.749	0.481	0.624	0.523	0.590	0.491
Arousal: satisfaction	0.456	0.555	0.603	0.771	0.776	1.000	0.666	0.690	0.698	0.706	0.577	0.609	0.666	0.692	0.424	0.599	0.464	0.537	0.424
Lubrication: frequency	0.464	0.580	0.775	0.754	0.755	0.666	1.000	0.688	0.721	0.641	0.673	0.535	0.557	0.518	0.315	0.492	0.331	0.458	0.411
Lubrication: difficulty	0.226	0.497	0.613	0.755	0.806	0.690	0.688	1.000	0.695	0.895	0.610	0.736	0.722	0.737	0.486	0.585	0.599	0.585	0.579
Lubrication: frequency of maintaining	0.420	0.521	0.618	0.685	0.720	0.698	0.721	0.695	1.000	0.649	0.717	0.650	0.651	0.615	0.391	0.501	0.405	0.495	0.320
Lubrication: difficulty in maintaining	0.161	0.457	0.491	0.736	0.770	0.706	0.641	0.895	0.649	1.000	0.559	0.736	0.699	0.707	0.491	0.535	0.609	0.577	0.585
Orgasm: frequency	0.391	0.617	0.603	0.687	0.696	0.577	0.673	0.610	0.717	0.559	1.000	0.635	0.681	0.631	0.517	0.564	0.500	0.507	0.349
Orgasm: difficulty	0.343	0.475	0.465	0.706	0.717	0.609	0.535	0.736	0.650	0.736	0.635	1.000	0.784	0.746	0.570	0.624	0.574	0.521	0.451
Orgasm: satisfaction	0.198	0.563	0.534	0.723	0.735	0.666	0.557	0.722	0.651	0.699	0.681	0.784	1.000	0.841	0.660	0.714	0.566	0.539	0.425
Satisfaction: intimacy of partner	0.316	0.574	0.599	0.721	0.749	0.692	0.518	0.737	0.615	0.707	0.631	0.746	0.841	1.000	0.605	0.671	0.525	0.629	0.545
Satisfaction: sexual relationship	0.072	0.397	0.271	0.431	0.481	0.424	0.315	0.486	0.391	0.491	0.517	0.570	0.660	0.605	1.000	0.725	0.313	0.290	0.228
Satisfaction: with overall sex life	0.254	0.509	0.436	0.581	0.624	0.599	0.492	0.585	0.501	0.535	0.564	0.624	0.714	0.671	0.725	1.000	0.411	0.320	0.287
Pain: frequency during vaginal intercourse	0.070	0.392	0.280	0.586	0.523	0.464	0.331	0.599	0.405	0.609	0.500	0.574	0.566	0.525	0.313	0.411	1.000	0.817	0.668
Pain: frequency after vaginal penetration	0.197	0.442	0.501	0.603	0.590	0.537	0.458	0.585	0.495	0.577	0.507	0.521	0.539	0.629	0.290	0.320	0.817	1.000	0.775
Pain: level during or after vaginal penetration	0.222	0.335	0.425	0.585	0.491	0.424	0.411	0.579	0.320	0.585	0.349	0.451	0.425	0.545	0.228	0.287	0.668	0.775	1.000
